# Supplementary material
Source: Springer Nature journal article supplement (https://www.springermedizin.de/resource/supplementary/12906_2012_1304_MOESM8_ESM.pdf/9522416)

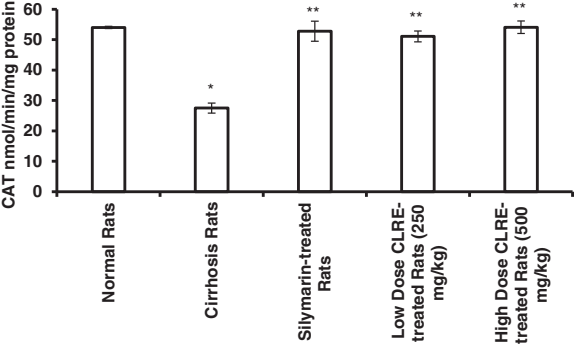

Supplement: MOESM8 [file 9522416]
